# Supplementary material for: Incidence and prevalence of diabetic ketoacidosis (DKA) among adults with type 1 diabetes mellitus (T1D): a systematic literature review
Source: PubMed Central journal article supplement — BMJ Open. 2017 Aug 1;7(7):e016587. doi: 10.1136/bmjopen-2017-016587 (PMC5642652; doi:10.1136/bmjopen-2017-016587), 2017-08-01
Supplement: bmjopen-2017-016587supp002.pdf [file bmjopen-2017-016587supp002.pdf]

| Reference                         | Study Design                                                         | Data Source                                                                                                                        | N                                                                        | DKA Definition                                                                                                                            | DKA Ascertainment                     | DKA Event Description in Publication                                            | Incidence per 1,000 PY                  | Prevalence per 1,000 People                  |
|-----------------------------------|----------------------------------------------------------------------|------------------------------------------------------------------------------------------------------------------------------------|--------------------------------------------------------------------------|-------------------------------------------------------------------------------------------------------------------------------------------|---------------------------------------|---------------------------------------------------------------------------------|-----------------------------------------|----------------------------------------------|
| <b>US and Canada</b>              |                                                                      |                                                                                                                                    |                                                                          |                                                                                                                                           |                                       |                                                                                 |                                         |                                              |
| <b>Beck 2012</b> <sup>35</sup>    | Prospective, multicenter, clinic-based patient registry              | T1D Exchange Clinic Registry in US                                                                                                 | 25,833 <sup>†</sup>                                                      | NR                                                                                                                                        | Patient self-report via questionnaire | Percent of patients with at least 1 DKA event in the prior 12 months            | NR                                      | Overall: 80 <sup>†</sup><br>Definite T1D: 90 |
| <b>Butalia 2013</b> <sup>22</sup> | Data linkage study combining clinical and administrative health data | T1D patient database, inpatient discharge database, kidney disease laboratory data, and census in Canada                           | 1,994                                                                    | DKA hospitalization was identified using the ICD-10-CA. The relevant codes included E10.100, E10.101, E10.120, E10.121, E10.10 and E10.12 | Based on hospitalization records      | Number of patients with and without a DKA hospitalization over the study period | NR                                      | 127.9 <sup>†</sup>                           |
| <b>Butalia 2014</b> <sup>23</sup> | Data linkage study combining clinical and administrative health data | T1D patient database, inpatient discharge database, kidney disease laboratory data, census, and database of postal codes in Canada | 1,467                                                                    | DKA hospitalization was identified using the ICD-10-CA. The relevant codes included E10.100, E10.101, E10.120, E10.121, E10.10 and E10.12 | Based on hospitalization records      | Number of patients with and without a DKA hospitalization over the study period | NR                                      | 102.9 <sup>†</sup>                           |
| <b>Cengiz 2013</b> <sup>24</sup>  | Prospective, multicenter, clinic-based patient registry              | T1D Exchange Clinic Registry in US                                                                                                 | 13,487<br>DKA subset, n=13,005<br><br>Aged 18 to <26 yrs subset, n=3,624 | Patient-reported overnight hospitalization for DKA                                                                                        | Patient self-report via questionnaire | Percent of patients with at least 1 DKA event in the prior 12 months            | NR                                      | Overall: 99                                  |
| <b>Garg 2004</b> <sup>37</sup>    | Retrospective analysis from a single center                          | Electronic patient record system in US                                                                                             | 515                                                                      | NR                                                                                                                                        | Patient medical records               | Number of patients who had a DKA event over the study period                    | Cumulative incidence: 55.6 <sup>†</sup> | NR                                           |
| <b>Miller 2015</b> <sup>38</sup>  | Prospective, multicenter, clinic-based patient registry              | T1D Exchange Clinic Registry in US                                                                                                 | 16,061*<br>DKA subset, n=2,561                                           | Participant-reported DKA diagnosed by a doctor that required treatment in a                                                               | Patient self-report via questionnaire | Percent of patients with at least 1 DKA event in the prior 3 months             | NR                                      | Overall: 30                                  |

| Reference                           | Study Design                                                            | Data Source                                                            | N                                                                                                                                                                                                     | DKA Definition                                                                                                                                                                                                                                 | DKA Ascertainment                                                                     | DKA Event Description in Publication                                 | Incidence per 1,000 PY                                                                                                                                                                                                             | Prevalence per 1,000 People                                                     |
|-------------------------------------|-------------------------------------------------------------------------|------------------------------------------------------------------------|-------------------------------------------------------------------------------------------------------------------------------------------------------------------------------------------------------|------------------------------------------------------------------------------------------------------------------------------------------------------------------------------------------------------------------------------------------------|---------------------------------------------------------------------------------------|----------------------------------------------------------------------|------------------------------------------------------------------------------------------------------------------------------------------------------------------------------------------------------------------------------------|---------------------------------------------------------------------------------|
|                                     |                                                                         |                                                                        |                                                                                                                                                                                                       | healthcare facility                                                                                                                                                                                                                            |                                                                                       |                                                                      |                                                                                                                                                                                                                                    |                                                                                 |
| <b>Nathan 2009</b> <sup>36</sup>    | Observational, longitudinal cohort study                                | EDIC study (extension of DCCT in Canada and US)<br><br>EDC study in US | <b>Conventional treatment</b><br>DCCT, n=730<br>EDIC, n=606<br><br><b>Intensive treatment</b><br>DCCT, n=711<br>EDIC, n=620<br><br><b>EDC</b><br>Baseline, n=161;<br>Year 10, n=105;<br>Year 18, n=88 | NR                                                                                                                                                                                                                                             | NR                                                                                    | Incidence rate per 1,000 PY                                          | <b>Conventional treatment</b><br>DCCT: 18<br>EDIC Year 6: 24<br>EDIC Year 12: 0<br><br><b>Intensive treatment</b><br>DCCT: 20<br>EDIC Year 6: 12<br>EDIC Year 12: 0<br><br><b>EDC</b><br>Baseline: 31<br>Year 10: 13<br>Year 18: 9 | NR                                                                              |
| <b>Simmons 2013</b> <sup>39</sup>   | Cross-sectional analysis of a prospective clinic-based patient registry | T1D Exchange Clinic Registry in US                                     | 1,894                                                                                                                                                                                                 | Patient-reported overnight hospitalization for DKA                                                                                                                                                                                             | Patient self-report via questionnaire                                                 | Percent of patients with at least 1 DKA event in the prior 12 months | NR                                                                                                                                                                                                                                 | Excellent HbA1c control (<6.5%): 10<br><br>Fair/poor HbA1c control (≥8.5%): 120 |
| <b>Trief 2014</b> <sup>31</sup>     | Cross-sectional analysis of a prospective clinic-based patient registry | T1D Exchange Clinic Registry in US                                     | 6,172                                                                                                                                                                                                 | Patient-reported overnight hospitalization for DKA                                                                                                                                                                                             | Patient self-report via questionnaire                                                 | Percent of patients with at least 1 DKA event in the prior 3 months  | NR                                                                                                                                                                                                                                 | Depressed: 110<br><br>Non-depressed: 40                                         |
| <b>Weinstock 2013</b> <sup>13</sup> | Cross-sectional analysis of a prospective clinic-based patient registry | T1D Exchange Clinic Registry in US                                     | 7,012<br><br>DKA subset, n=6,796                                                                                                                                                                      | Patient-reported overnight hospitalization for DKA<br><br>Clinic-documented hyperglycemia and symptoms such as polyuria, polydipsia, nausea, or vomiting; serum ketones or large/moderate urine ketones; arterial blood pH <7.30, or venous pH | Patient self-report via questionnaire (these data were used for all primary analyses) | Percent of patients with at least 1 DKA event in the prior 12 months | NR                                                                                                                                                                                                                                 | Overall: 48                                                                     |

| Reference                              | Study Design                                                            | Data Source                                                      | N                   | DKA Definition                                                                          | DKA Ascertainment                     | DKA Event Description in Publication                                              | Incidence per 1,000 PY                  | Prevalence per 1,000 People                                                                                           |
|----------------------------------------|-------------------------------------------------------------------------|------------------------------------------------------------------|---------------------|-----------------------------------------------------------------------------------------|---------------------------------------|-----------------------------------------------------------------------------------|-----------------------------------------|-----------------------------------------------------------------------------------------------------------------------|
|                                        |                                                                         |                                                                  |                     | <7.30, or serum bicarbonate <15 mmol/L; and treatment provided in a healthcare facility |                                       |                                                                                   |                                         |                                                                                                                       |
| <b>Wong 2014<sup>40</sup></b>          | Cross-sectional analysis of a prospective clinic-based patient registry | T1D Exchange Clinic Registry in US                               | 17,317 <sup>*</sup> | Patient-reported overnight hospitalization for DKA                                      | Patient self-report via questionnaire | Percent of patients with at least 1 DKA event in the prior 3 months               | NR                                      | <b>18 to &lt;26 yrs</b><br>CGM user: 80<br>CGM non-user: 40<br><br><b>≥26 yrs</b><br>CGM user: 30<br>CGM non-user: 20 |
| <b>Europe</b>                          |                                                                         |                                                                  |                     |                                                                                         |                                       |                                                                                   |                                         |                                                                                                                       |
| <b>Bohn 2015<sup>29</sup></b>          | Cross-sectional analysis of prospective, clinic-based patient registry  | DPV prospective database of T1D patients in Germany and Austria  | 18,028              | pH value <7.3 or hospital admission due to DKA                                          | Patient medical records               | DKA events per 100 PY                                                             | 51.3                                    | NR                                                                                                                    |
| <b>Bryden 2003<sup>30</sup></b>        | Single-center longitudinal cohort study                                 | Case register of a young adult diabetic clinic in United Kingdom | 113                 | Hospital admissions for DKA                                                             | Patient medical records               | Number of patients with ≥2 admissions for DKA over 1,261 PY of follow-up          | 7.9 <sup>†</sup>                        | NR                                                                                                                    |
| <b>Janez 2012<sup>41</sup></b>         | Prospective, single-center, clinic-based patient registry               | Registry of adult T1D patients treated with CSII in Slovenia     | 184                 | NR                                                                                      | Patient medical records               | Number of patients with a DKA episode over the study period                       | Cumulative incidence: 27.2 <sup>‡</sup> | NR                                                                                                                    |
| <b>Laimer 2016<sup>42</sup></b>        | Cross-sectional analysis of prospective, clinic-based patient registry  | DPV prospective database of T1D patients in Germany and Austria  | 5,545               | Hospital admission due to ketoacidosis with hyperglycemia >11 mmol/L and pH <7.3        | Patient medical records               | Percentage of patients with a DKA event                                           | NR                                      | 39                                                                                                                    |
| <b>Sparud-Lundin 2008<sup>43</sup></b> | Single-center, clinic-based longitudinal cohort study                   | Diabetes outpatient medical/nursing records from                 | 104                 | Blood pH <7.30                                                                          | Patient medical records               | Number and percentage of patients with a DKA event for each year (from 18–24 yrs) | NR                                      | Aged 18: 60<br>Aged 19: 30<br>Aged 20: 30<br>Aged 21: 10                                                              |

| Reference                          | Study Design                                                           | Data Source                                                                                                                                                                          | N                | DKA Definition                                                                                                                                                  | DKA Ascertainment                                                                                                                                                                                                          | DKA Event Description in Publication              | Incidence per 1,000 PY                                                                                                                                            | Prevalence per 1,000 People              |
|------------------------------------|------------------------------------------------------------------------|--------------------------------------------------------------------------------------------------------------------------------------------------------------------------------------|------------------|-----------------------------------------------------------------------------------------------------------------------------------------------------------------|----------------------------------------------------------------------------------------------------------------------------------------------------------------------------------------------------------------------------|---------------------------------------------------|-------------------------------------------------------------------------------------------------------------------------------------------------------------------|------------------------------------------|
|                                    |                                                                        | age 18–24 yrs in Sweden                                                                                                                                                              |                  |                                                                                                                                                                 |                                                                                                                                                                                                                            |                                                   |                                                                                                                                                                   | Aged 22: 10<br>Aged 23: 0<br>Aged 24: 10 |
| <b>Other Regions</b>               |                                                                        |                                                                                                                                                                                      |                  |                                                                                                                                                                 |                                                                                                                                                                                                                            |                                                   |                                                                                                                                                                   |                                          |
| <b>Lebenthal 2012<sup>25</sup></b> | Retrospective analysis                                                 | Medical records from a single center in Israel                                                                                                                                       | 452 <sup>†</sup> | Blood pH <7.3 with bicarbonate <15 mEq/L and need for intravenous fluid and insulin infusion                                                                    | Patient medical records                                                                                                                                                                                                    | DKA events per 100 PY                             | Familial T1D: 8<br>Sporadic T1D: 9                                                                                                                                | NR                                       |
| <b>Li 2014<sup>44</sup></b>        | Cross-sectional, multicenter, clinic-based study                       | Patient medical records from 16 tertiary hospitals in China                                                                                                                          | 611 <sup>†</sup> | Hyperglycemia (blood plasma glucose >13.9 mmol/L), blood bicarbonate <15 mmol/L and/or pH <7.30 (arterial), and elevated level of ketones in the urine or blood | Patient medical records; diagnosis based on criteria of the Chinese Diabetes Society, the American Diabetes Association, Lawson Wilkins Pediatric Endocrine Society, and the European Society for Paediatric Endocrinology | DKA events per 100 PY                             | 263                                                                                                                                                               | NR                                       |
| <b>Shalitin 2012<sup>45</sup></b>  | Retrospective analysis of patient medical records from a single center | Medical records from a single center in Israel<br><br><b>Group 1:</b> CSII initiated within 1 year of diagnosis<br><br><b>Group 2:</b> CSII initiated at least 1 year post-diagnosis | 488 <sup>†</sup> | Blood pH < 7.3 with bicarbonate <15 mEq/L and need for intravenous fluid and insulin infusion                                                                   | Patient medical records                                                                                                                                                                                                    | Average number of DKA events per patient per year | <b>Group 1</b><br>>19 yrs at last visit: 10<br>>19 yrs at CSII initiation: 0<br><br><b>Group 2</b><br>>19 yrs at last visit: 40<br>>19 yrs at CSII initiation: 30 | NR                                       |

Key: CGM = continuous glucose monitoring; CSII = continuous subcutaneous insulin infusion; DCCT = Diabetes Control and Complications Trial; DKA = diabetic ketoacidosis; EDC = Epidemiology of Diabetes Complications; EDIC = Epidemiology of Diabetes Interventions and Complications; DPV = Diabetes-Patienten-Verlaufsdokumentation; ICD-10-CA = International Classification of Diseases, 10th Revision with Canadian Enhancements; NR = not reported; PY = person-years; SLR = systematic literature review; T1D = type 1 diabetes mellitus; US = United States; yrs = years.

<sup>\*</sup> Overall study population; includes pediatric T1D patients (outcome data not included for pediatric patients).

<sup>†</sup> The overall patient population includes both definite T1D cases (patients meeting all diagnostic criteria) and probable T1D cases (patients meeting only some of the diagnostic criteria); the results for the definite T1D population were reported separately.

‡ Shaded (gray) cells represent outcome data that were calculated by the authors of this SLR based on the information available in the publication, rather than data directly reported by the study authors. Cumulative incidence was calculated/defined as number of cases out of total study population.
