# Supplementary material for: Incidence and prevalence of diabetic ketoacidosis (DKA) among adults with type 1 diabetes mellitus (T1D): a systematic literature review
Source: PubMed Central journal article supplement — BMJ Open. 2017 Aug 1;7(7):e016587. doi: 10.1136/bmjopen-2017-016587 (PMC5642652; doi:10.1136/bmjopen-2017-016587), 2017-08-01
Supplement: bmjopen-2017-016587supp004.pdf [file bmjopen-2017-016587supp004.pdf]

| Reference                        | Was the sample frame appropriate to address the target population? | Were study participants sampled in an appropriate way? | Was the sample size adequate?                         | Were the study participants and setting described in detail? | Was data analysis conducted with sufficient coverage of the identified sample? | Were valid methods used for the identification of the condition? | Was the condition measured in a standard, reliable way for all study participants? | Was the statistical analysis appropriate?             | Was the response rate adequate? If no, was the low response rate managed appropriately? |
|----------------------------------|--------------------------------------------------------------------|--------------------------------------------------------|-------------------------------------------------------|--------------------------------------------------------------|--------------------------------------------------------------------------------|------------------------------------------------------------------|------------------------------------------------------------------------------------|-------------------------------------------------------|-----------------------------------------------------------------------------------------|
| <b>Overview<br/>N=21 studies</b> | <b>12 (57%) Yes<br/>7 (33%) Unclear<br/>2 (10%) No</b>             | <b>17 (81%) Yes<br/>3 (14%) Unclear<br/>1 (5%) No</b>  | <b>15 (71%) Yes<br/>5 (24%) Unclear<br/>1 (5%) No</b> | <b>18 (86%) Yes<br/>0 (0%) Unclear<br/>3 (14%) No</b>        | <b>15 (71%) Yes<br/>5 (24%) Unclear<br/>1 (5%) No</b>                          | <b>9 (43%) Yes<br/>12 (57%) Unclear<br/>0 (0%) No</b>            | <b>11 (52%) Yes<br/>9 (43%) Unclear<br/>1 (5%) No</b>                              | <b>18 (86%) Yes<br/>3 (14%) Unclear<br/>0 (0%) No</b> | <b>16 (76%) Yes<br/>4 (19%) Unclear<br/>1 (5%) No</b>                                   |
| Beck 2012 <sup>35</sup>          | Yes                                                                | Yes                                                    | Yes                                                   | Yes                                                          | Yes                                                                            | Unclear                                                          | Unclear                                                                            | Yes                                                   | Yes                                                                                     |
| Bohn 2015 <sup>29</sup>          | Yes                                                                | Yes                                                    | Yes                                                   | Yes                                                          | Yes                                                                            | Yes                                                              | Yes                                                                                | Yes                                                   | Yes                                                                                     |
| Bryden 2003 <sup>30</sup>        | No                                                                 | Yes                                                    | No                                                    | Yes                                                          | Yes                                                                            | Yes                                                              | Yes                                                                                | Yes                                                   | Yes                                                                                     |
| Butalia 2013 <sup>22</sup>       | Unclear                                                            | Yes                                                    | Yes                                                   | Yes                                                          | Yes                                                                            | Yes                                                              | Yes                                                                                | Yes                                                   | Yes                                                                                     |
| Butalia 2014 <sup>23</sup>       | Unclear                                                            | Yes                                                    | Yes                                                   | Yes                                                          | Yes                                                                            | Yes                                                              | Yes                                                                                | Yes                                                   | Yes                                                                                     |
| Cengiz 2013 <sup>24</sup>        | Yes                                                                | Yes                                                    | Yes                                                   | Yes                                                          | Yes                                                                            | Unclear                                                          | Unclear                                                                            | Yes                                                   | Yes                                                                                     |
| Garg 2004 <sup>37</sup>          | Unclear                                                            | Unclear                                                | Unclear                                               | Yes                                                          | No                                                                             | Unclear                                                          | Unclear                                                                            | Unclear                                               | Unclear                                                                                 |
| Janez 2012 <sup>41</sup>         | No                                                                 | No                                                     | Unclear                                               | No                                                           | Unclear                                                                        | Unclear                                                          | Unclear                                                                            | Unclear                                               | Unclear                                                                                 |
| Laimer 2016 <sup>42</sup>        | Yes                                                                | Yes                                                    | Yes                                                   | Yes                                                          | Yes                                                                            | Yes                                                              | Yes                                                                                | Yes                                                   | Yes                                                                                     |
| Lebenthal 2012 <sup>25</sup>     | Yes                                                                | Yes                                                    | Unclear                                               | Yes                                                          | Unclear                                                                        | Yes                                                              | Yes                                                                                | Yes                                                   | Unclear                                                                                 |
| Li 2014 <sup>44</sup>            | Unclear                                                            | Yes                                                    | Yes                                                   | Yes                                                          | Unclear                                                                        | Yes                                                              | Yes                                                                                | Yes                                                   | Unclear                                                                                 |
| Miller 2015 <sup>38</sup>        | Yes                                                                | Yes                                                    | Yes                                                   | Yes                                                          | Yes                                                                            | Unclear                                                          | Unclear                                                                            | Yes                                                   | Yes                                                                                     |
| Nathan 2009 <sup>36</sup>        | Yes                                                                | Yes                                                    | Yes                                                   | Yes                                                          | Yes                                                                            | Unclear                                                          | Unclear                                                                            | Yes                                                   | Yes                                                                                     |
| Shalitin 2012 <sup>45</sup>      | Unclear                                                            | Yes                                                    | Unclear                                               | Yes                                                          | Unclear                                                                        | Yes                                                              | Yes                                                                                | Yes                                                   | Yes                                                                                     |
| Simmons 2013 <sup>39</sup>       | Yes                                                                | Yes                                                    | Yes                                                   | Yes                                                          | Yes                                                                            | Unclear                                                          | Unclear                                                                            | Yes                                                   | Yes                                                                                     |

| Reference                        | Was the sample frame appropriate to address the target population? | Were study participants sampled in an appropriate way? | Was the sample size adequate?                | Were the study participants and setting described in detail? | Was data analysis conducted with sufficient coverage of the identified sample? | Were valid methods used for the identification of the condition? | Was the condition measured in a standard, reliable way for all study participants? | Was the statistical analysis appropriate?    | Was the response rate adequate? If no, was the low response rate managed appropriately? |
|----------------------------------|--------------------------------------------------------------------|--------------------------------------------------------|----------------------------------------------|--------------------------------------------------------------|--------------------------------------------------------------------------------|------------------------------------------------------------------|------------------------------------------------------------------------------------|----------------------------------------------|-----------------------------------------------------------------------------------------|
| <b>Overview</b><br>N=21 studies  | 12 (57%) Yes<br>7 (33%) Unclear<br>2 (10%) No                      | 17 (81%) Yes<br>3 (14%) Unclear<br>1 (5%) No           | 15 (71%) Yes<br>5 (24%) Unclear<br>1 (5%) No | 18 (86%) Yes<br>0 (0%) Unclear<br>3 (14%) No                 | 15 (71%) Yes<br>5 (24%) Unclear<br>1 (5%) No                                   | 9 (43%) Yes<br>12 (57%) Unclear<br>0 (0%) No                     | 11 (52%) Yes<br>9 (43%) Unclear<br>1 (5%) No                                       | 18 (86%) Yes<br>3 (14%) Unclear<br>0 (0%) No | 16 (76%) Yes<br>4 (19%) Unclear<br>1 (5%) No                                            |
| Sparud-Lundin 2008 <sup>43</sup> | Unclear                                                            | Unclear                                                | Unclear                                      | Yes                                                          | Unclear                                                                        | Unclear                                                          | Yes                                                                                | Yes                                          | No                                                                                      |
| Trief 2014 <sup>31</sup>         | Yes                                                                | Yes                                                    | Yes                                          | Yes                                                          | Yes                                                                            | Unclear                                                          | Unclear                                                                            | Yes                                          | Yes                                                                                     |
| Weinstock 2013 <sup>13</sup>     | Yes                                                                | Yes                                                    | Yes                                          | Yes                                                          | Yes                                                                            | Unclear                                                          | Yes                                                                                | Yes                                          | Yes                                                                                     |
| Wong 2014 <sup>40</sup>          | Yes                                                                | Yes                                                    | Yes                                          | Yes                                                          | Yes                                                                            | Unclear                                                          | Unclear                                                                            | Yes                                          | Yes                                                                                     |

Key: JBI = Joanna Briggs Institute.
